# Supplementary material for: Normas profesionales de la INTOSAI: directrices de auditoría. Aplicación a la actividad fiscalizadora de los Órganos Institucionales de Control Externo Autonómicos
Source: MDPI journal article supplement (doi:10.3390/biomedicines12040809), 2013-01-01
Supplement: s1 [file s1]

Supplementary Materials for

# PBMCs as tool for identification of novel immunotherapy biomarkers in lung cancer

Caterina De Rosa<sup>1,†</sup>, Francesca Iommelli<sup>2,†</sup>, Viviana De Rosa<sup>2,\*</sup>, **Giuseppe Ercolano<sup>3</sup>, Federica Sodano<sup>3</sup>**, Concetta Tuccillo<sup>1</sup>, Luisa Amato<sup>1</sup>, Virginia Tirino<sup>4,5</sup>, Annalisa Ariano<sup>1</sup>, Flora Cimmino<sup>6</sup>, Gaetano di Guida<sup>1</sup>, Gennaro Filosa<sup>1</sup>, Alessandra di Liello<sup>1</sup>, Davide Ciardiello<sup>7</sup>, Erika Martinelli<sup>1</sup>, Teresa Troiani<sup>1</sup>, Stefania Napolitano<sup>1</sup>, Giulia Martini<sup>1</sup>, Fortunato Ciardiello<sup>1</sup>, Federica Papaccio<sup>8</sup>, Floriana Morgillo<sup>1,††</sup>, Carminia Maria Della Corte<sup>1,††,\*</sup>

<sup>1</sup>Department of Precision Medicine, University of Campania Luigi Vanvitelli, Italy; [caterina.derosa1@unicampania.it](mailto:caterina.derosa1@unicampania.it), [concetta.tuccillo@unicampania.it](mailto:concetta.tuccillo@unicampania.it), [luisa.amato@unicampania.it](mailto:luisa.amato@unicampania.it), [annalisaariano98@outlook.it](mailto:annalisaariano98@outlook.it), [gaetano.diguidda@studenti.unicampania.it](mailto:gaetano.diguidda@studenti.unicampania.it), [gennaro.filosa@unicampania.it](mailto:gennaro.filosa@unicampania.it), [alessandradiliello@gmail.com](mailto:alessandradiliello@gmail.com), [erika.martinelli@unicampania.it](mailto:erika.martinelli@unicampania.it), [teresa.troiani@unicampania.it](mailto:teresa.troiani@unicampania.it), [stefania.napolitano@unicampania.it](mailto:stefania.napolitano@unicampania.it), [giulia.martini@unicampania.it](mailto:giulia.martini@unicampania.it), [fortunato.ciardiello@unicampania.it](mailto:fortunato.ciardiello@unicampania.it), [floriana.morgillo@unicampania.it](mailto:floriana.morgillo@unicampania.it), [carminiamaria.dellacorte@unicampania.it](mailto:carminiamaria.dellacorte@unicampania.it)

<sup>2</sup>Institute of Biostructures and Bioimaging, National Research Council, Naples, Italy; [francesca.iommelli@ibb.cnr.it](mailto:francesca.iommelli@ibb.cnr.it), [viviana.derosa@ibb.cnr.it](mailto:viviana.derosa@ibb.cnr.it)

<sup>3</sup>Department of Pharmacy, School of Medicine, University of Naples Federico II, Italy; [giuseppe.ercolano@unina.it](mailto:giuseppe.ercolano@unina.it), [federica.sodano@unina.it](mailto:federica.sodano@unina.it)

<sup>4</sup>Department of Experimental Medicine, University of Campania Luigi Vanvitelli, Italy; [virginia.tirino@unicampania.it](mailto:virginia.tirino@unicampania.it)

<sup>5</sup>U.P. Diagnostica Citometrica e Mutazionale, A.O.U. Vanvitelli, Università degli Studi della Campania, Naples, Italy

<sup>6</sup>Hospital "Martiri Di Villa Malta", Sarno, Campania, Italy; [floracimmino81@gmail.com](mailto:floracimmino81@gmail.com)

<sup>7</sup>Division of Gastrointestinal Medical Oncology and Neuroendocrine Tumors, European Institute of Oncology (IEO), IRCCS, Milan, Italy; [davide.ciardiello@unicampania.it](mailto:davide.ciardiello@unicampania.it)

<sup>8</sup>Department of Medicine, Surgery and Dentistry, "Scuola Medica Salernitana", University of Salerno, Baronissi, Italy; [fpapaccio@unisa.it](mailto:fpapaccio@unisa.it)

\*Correspondence: [viviana.derosa@ibb.cnr.it](mailto:viviana.derosa@ibb.cnr.it); tel +390812203430 and [carminiamaria.dellacorte@unicampania.it](mailto:carminiamaria.dellacorte@unicampania.it); tel.: +393929160541

† These authors contributed equally to this work as co-first authors

†† These authors contributed equally to this work as co-last authors

**The PDF file includes:**

**Table S1. Cytokine assay characteristics**

| <b>Cytokine</b> | <b>Vendor</b> | <b>Range standard curve</b> | <b>Limit of detection</b> |
|-----------------|---------------|-----------------------------|---------------------------|
| CCL5            | Invitrogen    | 51,2-2000 pg/ml             | 2 pg/ml                   |
| CXCL10          | Invitrogen    | 7.8-500 pg/ml               | 2 pg/ml                   |

**Table S2. Correlation analysis in lung cancer patients (BR, R and NR) between STING/cGAS mRNA level and serum CXCL10 and CCL5**

|                | BR                     |                      |                       |                     |                       |
|----------------|------------------------|----------------------|-----------------------|---------------------|-----------------------|
|                | STING<br>vs.<br>CXCL10 | STING<br>vs.<br>CCL5 | cGAS<br>vs.<br>CXCL10 | cGAS<br>vs.<br>CCL5 | CXCL10<br>vs.<br>CCL5 |
| <b>r value</b> | 0.2855                 | -0.1014              | 0.02951               | -0.4408             | -0.2404               |
| <b>95% CI</b>  | -0.6847 to 0.8907      | -0.8436 to 0.7738    | -0.8012 to 0.8214     | -0.9224 to 0.5773   | -0.8802 to 0.7096     |
| <b>p value</b> | 0.5834                 | 0.8484               | 0.9557                | 0.3816              | 0.6463                |

|                | R                      |                      |                       |                     |                       |
|----------------|------------------------|----------------------|-----------------------|---------------------|-----------------------|
|                | STING<br>vs.<br>CXCL10 | STING<br>vs.<br>CCL5 | cGAS<br>vs.<br>CXCL10 | cGAS<br>vs.<br>CCL5 | CXCL10<br>vs.<br>CCL5 |
| <b>r value</b> | -0.1615                | 0.1426               | -0.2599               | 0.2024              | 0.4792                |
| <b>95% CI</b>  | -0.7777 to 0.6129      | -0.6249 to 0.7699    | -0.8152 to 0.5445     | -0.5858 to 0.7939   | -0.3404 to 0.8850     |
| <b>p value</b> | 0.7023                 | 0.7363               | 0.5343                | 0.6307              | 0.2295                |

|                | NR                     |                      |                       |                     |                       |
|----------------|------------------------|----------------------|-----------------------|---------------------|-----------------------|
|                | STING<br>vs.<br>CXCL10 | STING<br>vs.<br>CCL5 | cGAS<br>vs.<br>CXCL10 | cGAS<br>vs.<br>CCL5 | CXCL10<br>vs.<br>CCL5 |
| <b>r value</b> | 0.1732                 | 0.4973               | 0.7252                | 0.6996              | 0.8396                |
| <b>95% CI</b>  | -0.6669 to 0.8194      | -0.5269 to 0.9325    | -0.06129 to 0.9561    | -0.2590 to 0.9639   | 0.08816 to 0.9820     |
| <b>p value</b> | 0.7104                 | 0.3155               | 0.0651                | 0.1218              | 0.0365                |
